# Supplementary material for: TGFβ blocks IFNα/β release and tumor rejection in spontaneous mammary tumors
Source: PubMed Central journal article supplement (PMC6739328; doi:10.1038/s41467-019-11998-w), 2019-09-11
Supplement: 41467_2019_11998_MOESM1_ESM.pdf [file 41467_2019_11998_MOESM1_ESM.pdf]

## **Supplementary Information**

**TGF $\beta$  blocks IFN $\alpha/\beta$  release and tumor rejection in spontaneous mammary tumors**

**Guerin et al.**

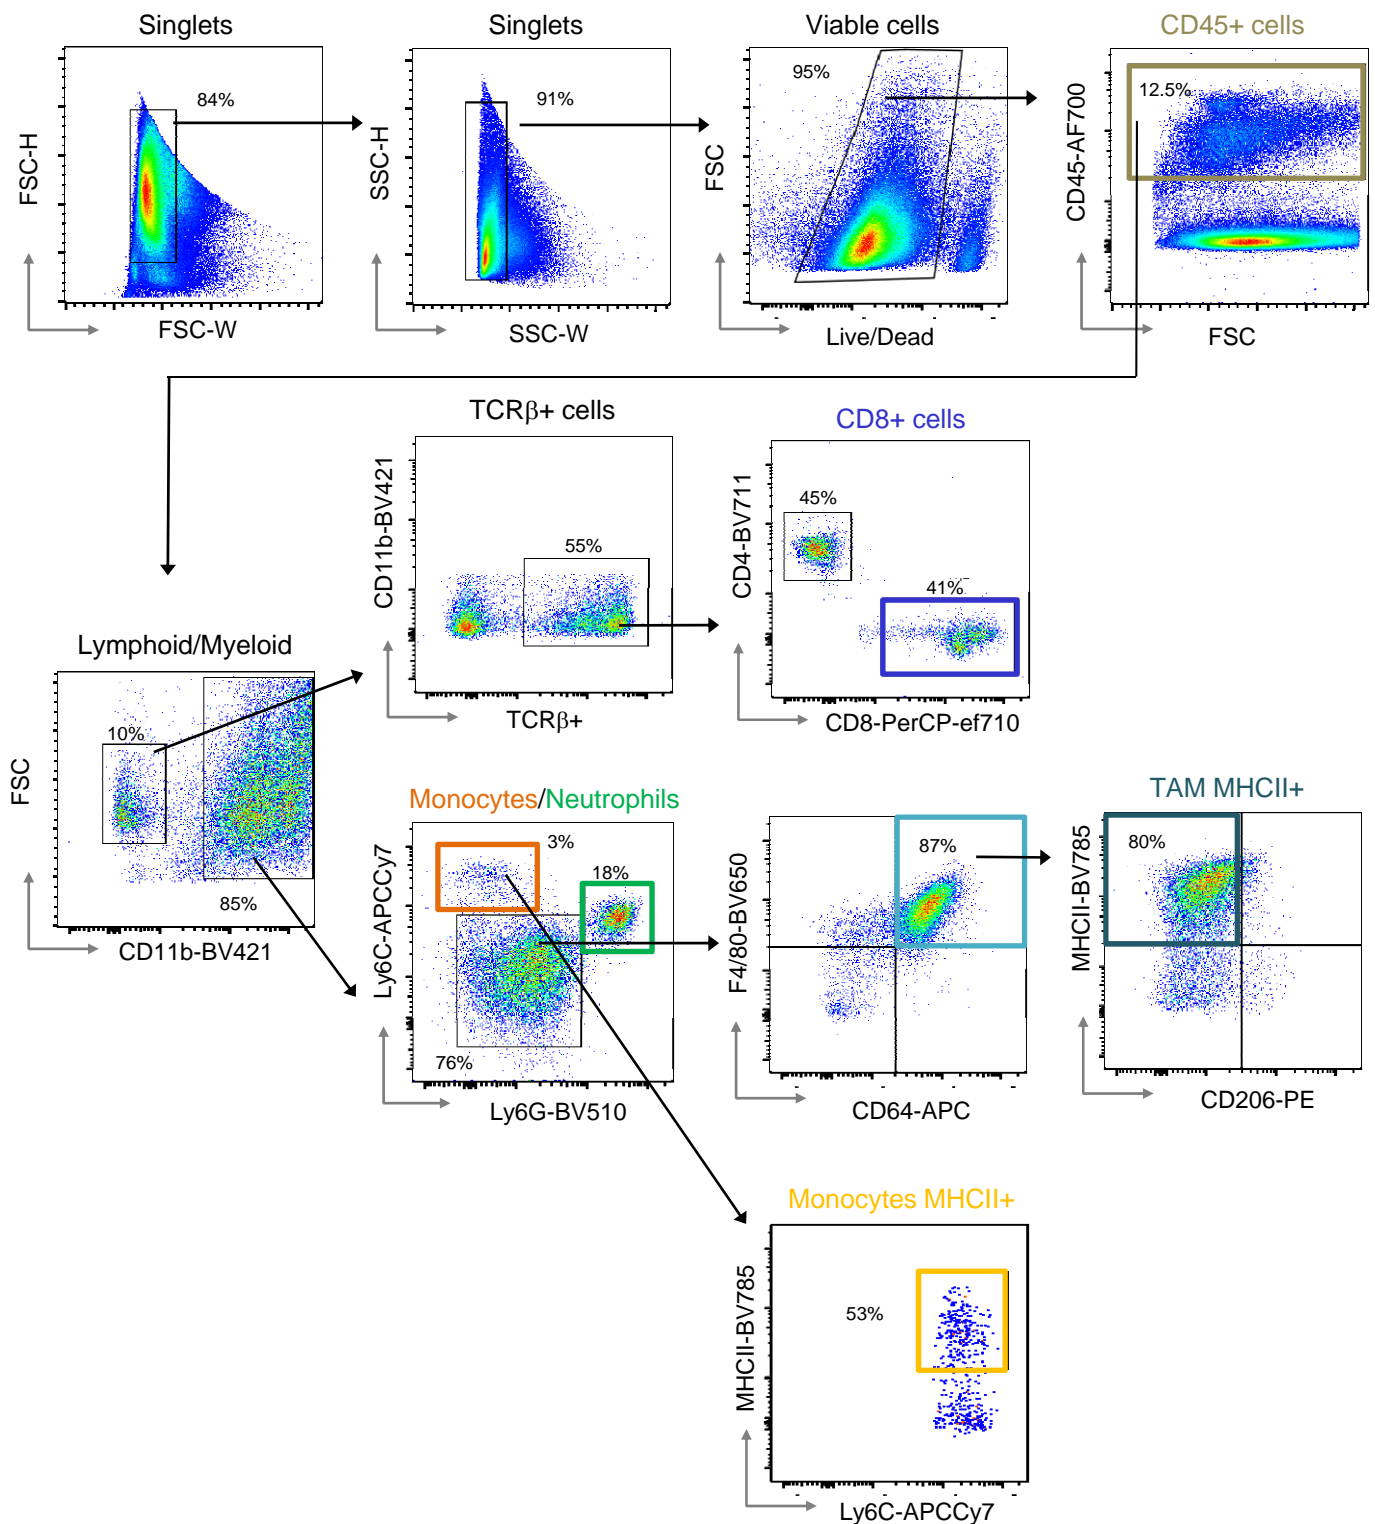

**Supplementary Figure 1. FACS sequential gating strategies.**

Tumor Immune infiltrating cells were identified after exclusion of doublets and dead cells (Live/dead<sup>neg</sup>;CD45<sup>+</sup>). Sequential gating allows for identification of CD8 T cells (Live/dead<sup>neg</sup>;CD45<sup>+</sup>;CD11b<sup>+</sup>;TCRβ<sup>+</sup>;CD8<sup>+</sup>), monocytes (Live/dead<sup>neg</sup>;CD45<sup>+</sup>;CD11b<sup>+</sup>;Ly6C<sup>+</sup>/Ly6G<sup>-</sup>), neutrophils (Live/dead<sup>neg</sup>;CD45<sup>+</sup>;CD11b<sup>+</sup>;Ly6C<sup>lo</sup>/Ly6G<sup>+</sup>), TAM (Live/dead<sup>neg</sup>;CD45<sup>+</sup>;CD11b<sup>+</sup>;Ly6C<sup>-</sup>/Ly6G<sup>+</sup>; CD64<sup>+</sup>/F480<sup>+</sup>), including MHC II<sup>+</sup> TAM subset.

a

Trans-PyMT tumors

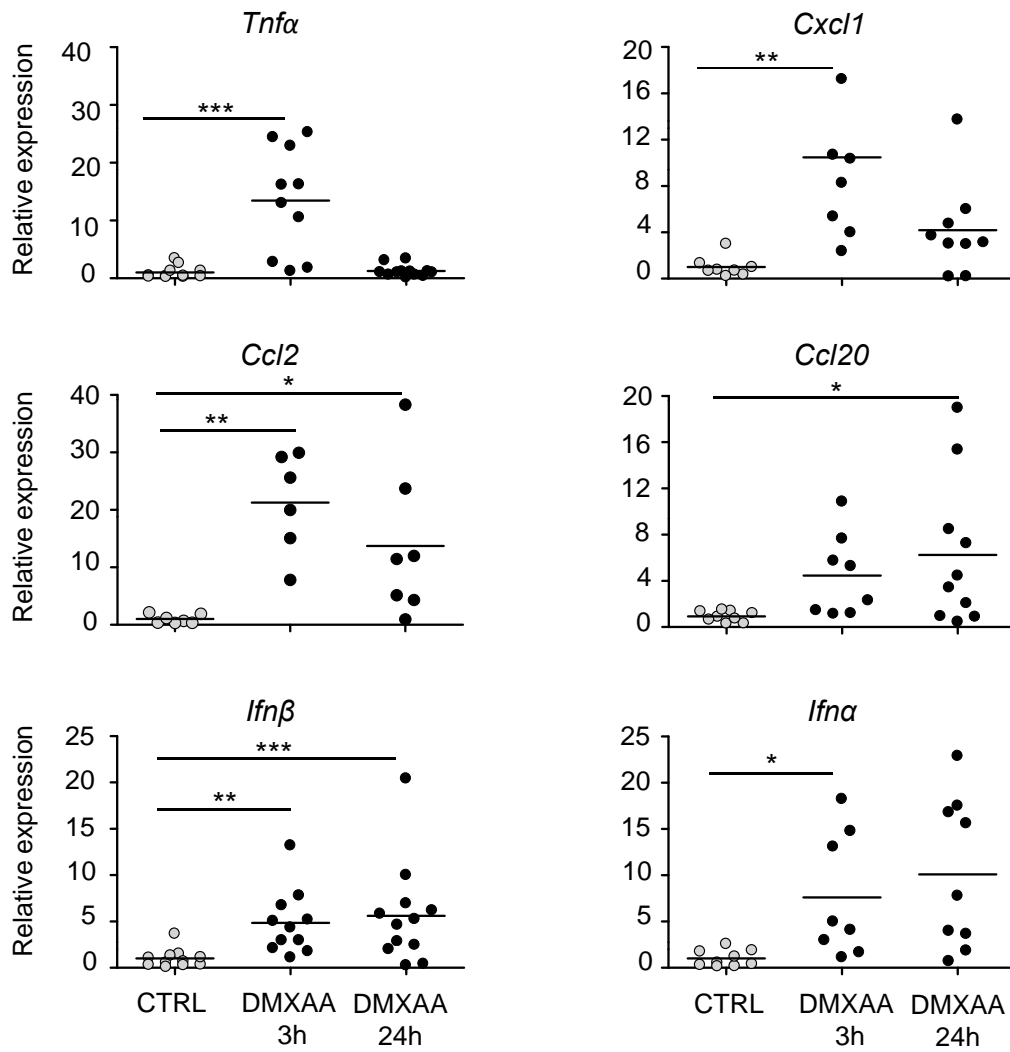

b

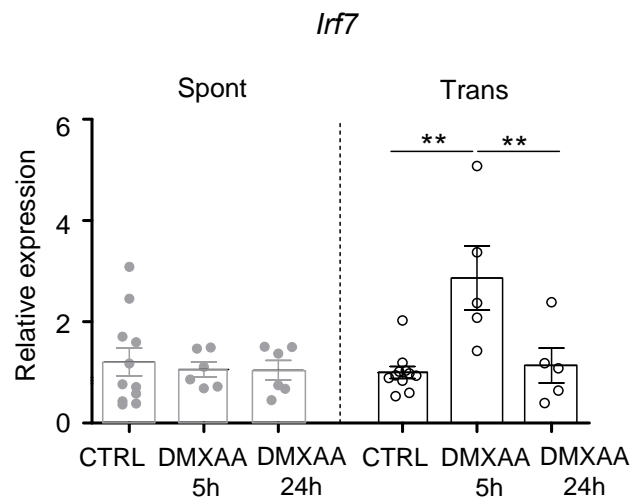

**Supplementary Figure 2. Cytokines and chemokines expression induced by DMXAA in Trans-PyMT tumors.**

**(a)** Trans-PyMT mice were injected i.p. with DMXAA (black circles) or DMSO (grey circles), and mRNA levels of cytokines and chemokines were measured after 3 hours or 24 hours as indicated in Fig. 2a. The relative expression, normalized to Trans-PyMT control tumors, is shown and the median is indicated. Cumulative data, with the Median, are shown. Data of 7-11 mice, from 3-5 independent experiments are shown. Tukey's Multiple Comparison Test. \*  $p < 0.05$ ; \*\*  $p < 0.01$ ; \*\*\*  $p < 0.001$ . **(b)** Spont and Trans-PyMT mice were injected i.p. with DMXAA or DMSO, and mRNA levels of cytokines and chemokines were measured after 5 hours or 24 hours. The relative expression, normalized to Trans-PyMT control tumors, is shown. Results are expressed as mean  $\pm$  SEM. Data were obtained from Trans-PyMT mice:  $n=9$  CTRL and  $n=5$  DMXAA treated and from Spont-PyMT mice:  $n=5$  CTRL and  $n=3$  DMXAA treated, from 3 independent experiments. Tukey's Multiple Comparison Test. \*  $p < 0.05$ ; \*\*  $p < 0.01$ ; \*\*\*  $p < 0.001$ . Source Data are provided as a Source Data file.

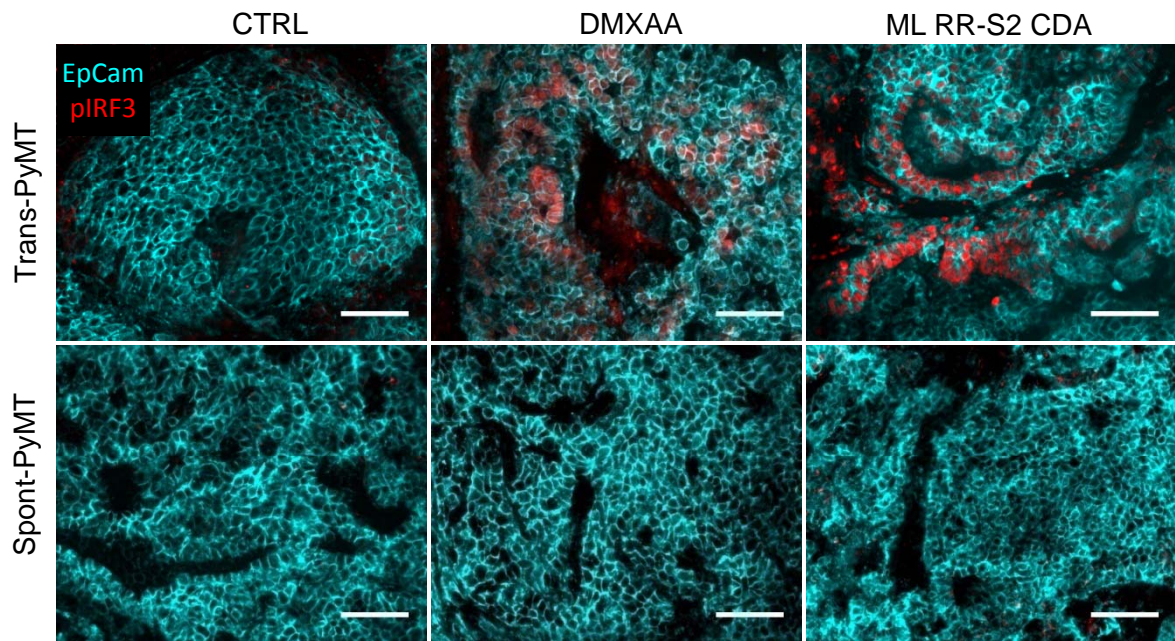

**Supplementary Figure 3. I.t. injection of DMXAA or ML RR-S2 CDA induced pIRF3 in Trans-PyMT, but not in Spont-PyMT mice.** Trans- and Spont-PyMT mice were injected i.t. with DMXAA (1x 500 $\mu$ g) or ML RR-S2 CDA (1x 50 $\mu$ g). Tumors were collected 3 hours later and tumor slices stained with anti-EpCAM (blue) and anti-pIRF3 (red) mAbs. Scale bars = 50  $\mu$ m. Images representative of Spont-PyMT mice:  $n=3$  (CTRL),  $n=2$  (DMXAA),  $n=2$  (ML RR-S2 CDA); Trans-PyMT mice:  $n=2$  (CTRL),  $n=2$  (DMXAA),  $n=2$  (ML RR-S2 CDA), from 5 independent experiments, are shown.

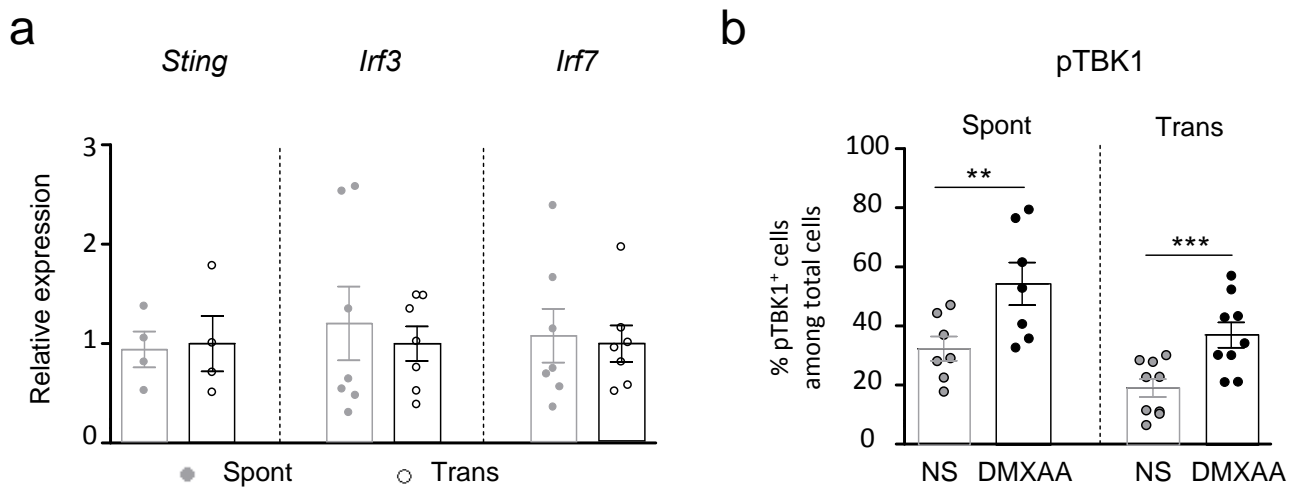

**Supplementary Figure 4. Induction of *Sting*, *Irf3*, *Irf7* expression and activation of TBK1 after DMXAA**

**(a)** Expression of *Sting*, *Irf3* and *Irf7* mRNA transcripts in tumors of Spont-PyMT mice (grey circles) and Trans-PyMT (open circles) mice. The relative expression is shown, normalized to Trans-PyMT tumors. Spont-PyMT mice:  $n=3$ , Trans-PyMT mice:  $n=4$  (*Sting*) or 7 (*Irf3* and *Irf7*) from 3 independent experiments. **(b)** Similar activation of TBK1 in Spont- and Trans-PyMT tumors after DMXAA stimulation in vitro. Tumor cell suspensions from Spont-PyMT and Trans-PyMT mice were prepared as in Fig. 5b, cultured for 3 hours in vitro with DMXAA (250  $\mu\text{g}/\text{ml}$ ) or left untreated, then the levels of TBK1 activation (pTBK1) was determined by flow cytometry. The percentage of pTBK1<sup>+</sup> cells in DMXAA-treated versus control-treated conditions is shown. Spont-PyMT mice:  $n=3$ , Trans-PyMT mice:  $n=8$ . Data are from 3 independent experiments. Results are expressed as mean  $\pm$  SEM. Paired  $t$ -Test. \*  $p<0.05$ ; \*\*  $p<0.01$ ; \*\*\*  $p<0.001$ . Source Data are provided as a Source Data file.

**a**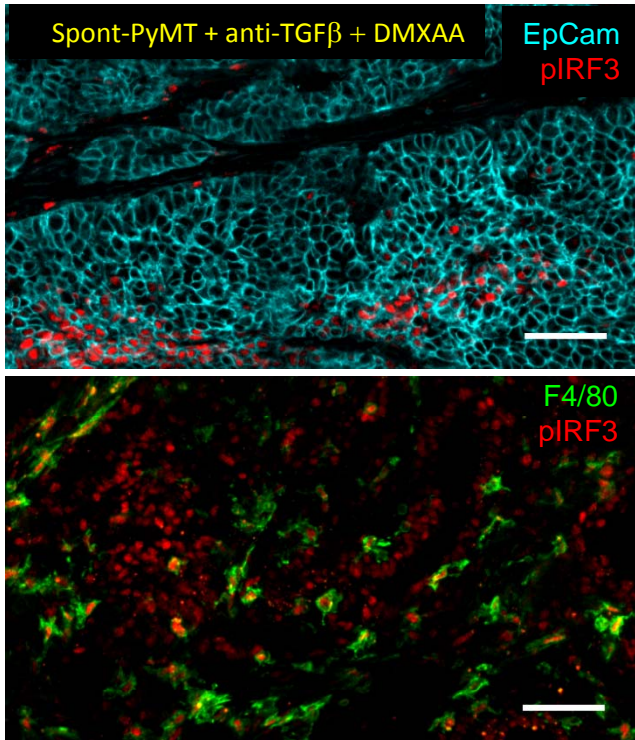**b**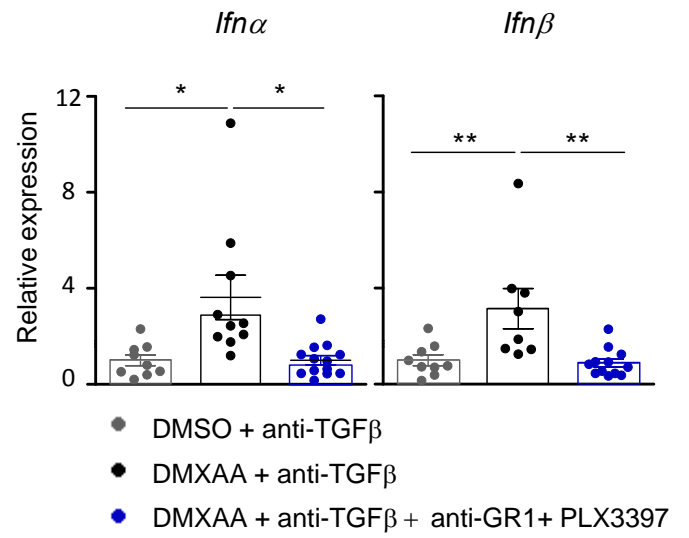**c**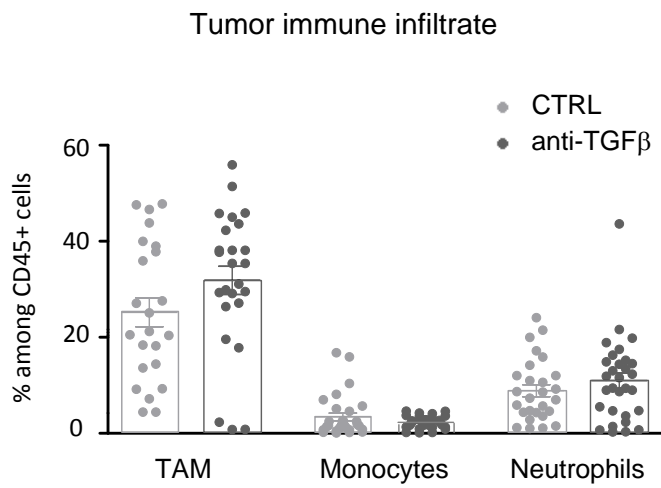**d**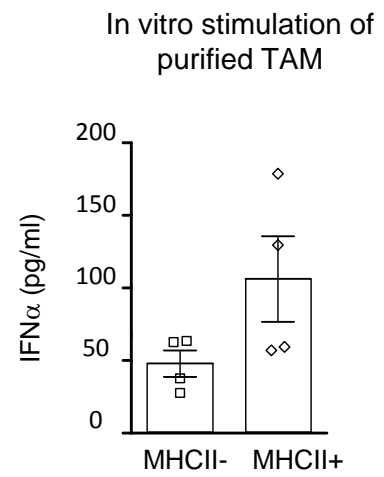

**Supplementary Figure 5. Blocking TGF $\beta$  allows DMXAA-induced pIRF3 and IFN $\alpha$  production in TAM.**

**(a)** Spont-PyMT mice, treated with an anti-TGF $\beta$ , received one i.p. injection of DMXAA. Tumors were stained as in Fig. 5a. Two different image fields show that pIRF3<sup>+</sup> cells may be tumor cells (EpCAM<sup>+</sup>, blue, top), or myeloid cells (F4/80<sup>+</sup>, green, bottom). Scale bars 50  $\mu$ m. Images representative of 4 treated Spont-PyMT mice. **(b)** Spont-PyMT mice treated with an anti-TGF $\beta$  alone or in combination with anti-GR1 (day-4 and day-1) and PLX3397 (from day-2 to day +1), received DMXAA or DMSO on day0. *Ifn $\alpha$*  and *Ifn $\beta$*  gene expression were measured in tumors on day 1. The relative expression is shown, normalized to control tumors (DMSO, anti-TGF $\beta$  treated mice). Spont-PyMT mice treated with: DMSO + anti-TGF $\beta$  ( $n=3$ ) (grey circles), DMXAA + anti-TGF $\beta$  ( $n=3$ ) (black circles), DMXAA + anti-TGF $\beta$  + anti-GR1 and PLX3397 ( $n=4$ ) (blue circles) from 4 independent experiments. Tukey's Multiple Comparison Test. \*  $p<0.05$ ; \*\*  $p<0.01$ ; \*\*\*  $p<0.001$ . **(c)** The proportion of TAM, monocytes and neutrophils among CD45<sup>+</sup> cells in tumors was determined in Spont-PyMT mice pre-treated (dark grey circles) or not (light grey circles) with an anti-TGF $\beta$ . Spont-PyMT mice:  $n= 3$ , anti-TGF $\beta$  Spont-PyMT mice:  $n=3$  from 3 independent experiments. **(d)** MHC II<sup>+</sup> (open diamonds) and MHC II<sup>-</sup> (open squares) TAM from Spont-PyMT tumors were sorted, stimulated overnight with DMXAA, and IFN $\alpha$  released was quantified by ELISA.  $n=4$  mice from 4 independent experiments. Results are expressed as mean  $\pm$  SEM. Source Data are provided as a Source Data file.



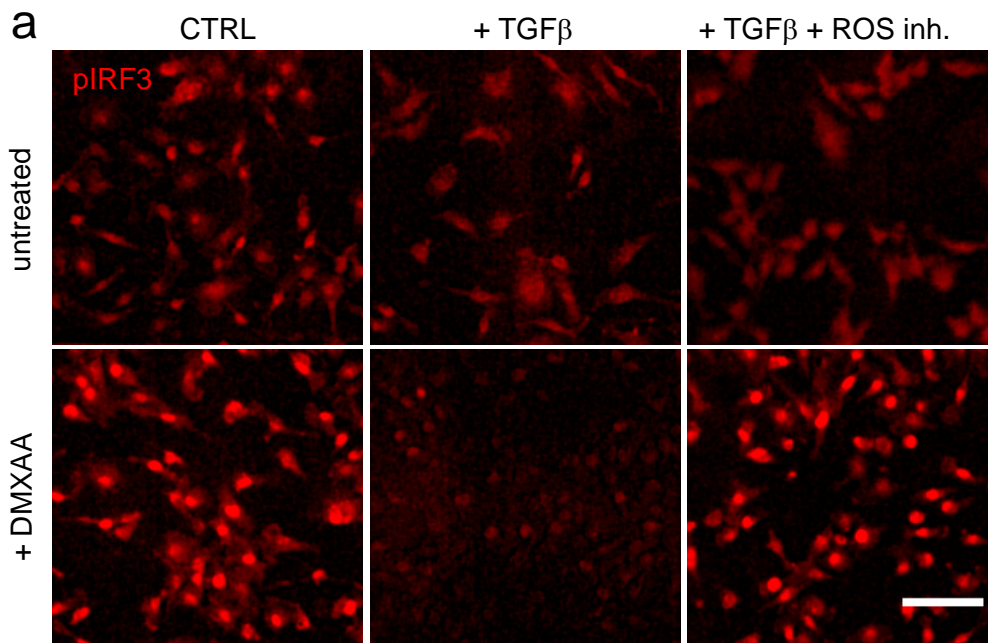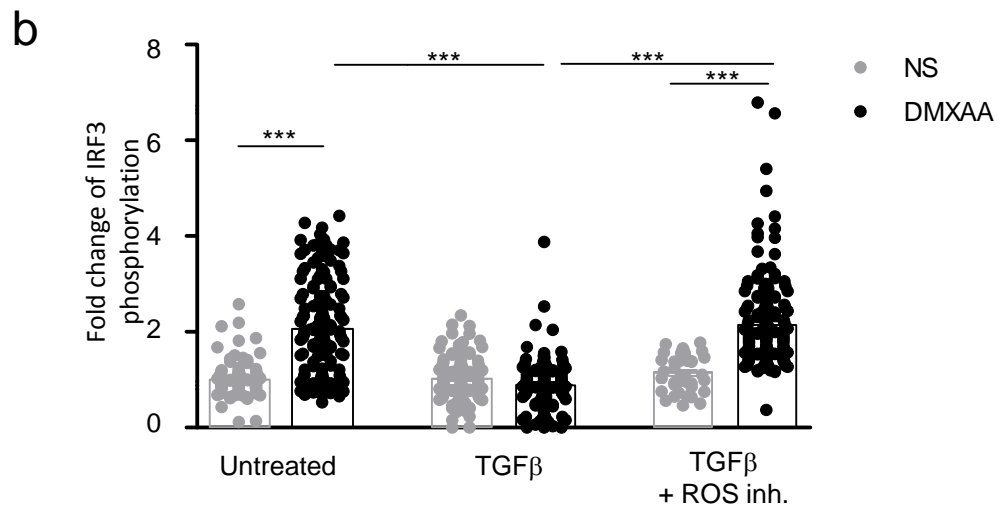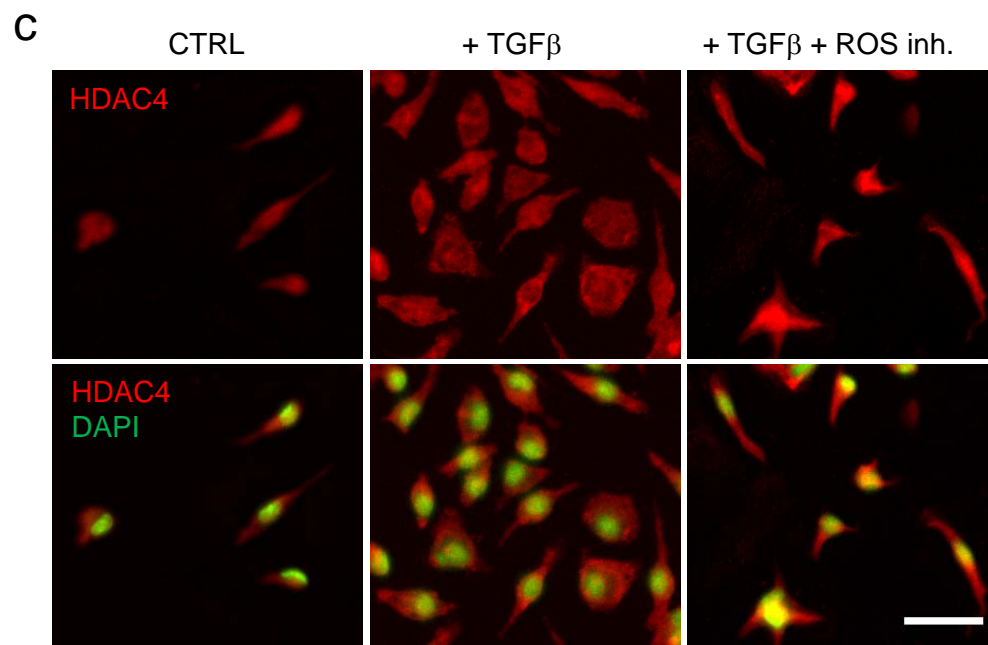

**Supplementary Figure 6. TGF $\beta$  alters pIRF3 in DMXAA-stimulated BMDM by the nuclear export of HDAC4.**

**(a)** BMDM were cultured overnight with TGF $\beta$  (5ng/ml), TGF $\beta$  + ROS inhibitor (1nM) or left untreated. Cells were then stimulated or not with DMXAA (250 $\mu$ g/ml) for 3 hours, then stained with anti-pIRF3 Ab (red). Scale bar = 50  $\mu$ m. **(b)** The increase in the surface covered by pIRF3<sup>+</sup> staining was measured in DMXAA-stimulated (black circles) compared to unstimulated (grey circles) cells. Results are expressed as mean  $\pm$  SEM from the cumulative data of 3 independent experiments. Tukey's Multiple Comparison Test . \* p<0.05; \*\* p<0.01; \*\*\* p<0.001. **(c)** BMDM exposed to TGF $\beta$  or TGF $\beta$  + ROS inhibitor as in **a**, were stained with anti-HDAC4 Ab (red) and, for the nucleus, DAPI (green). Top: HDAC4; Bottom: overlay with DAPI. Scale bar = 30  $\mu$ m. Images from one experiment are shown and are representative of 3 independent experiments. Source Data are provided as a Source Data file.

|                                |                         |                             |
|--------------------------------|-------------------------|-----------------------------|
| <i>Ifn<math>\alpha</math>4</i> | TGATGAGCTACTACTGGTCAGC  | GATCTCTTAGCACAAGGATGGC      |
| <i>Ifn<math>\beta</math></i>   | TGGGTGGAATGAGACTATTGTTG | CTCCACGTCAATCTTTCTCT        |
| <i>Ccl2</i>                    | CATCCACGTGTTGGCTCA      | GATCATCTTGCTGGTGAATGAGT     |
| <i>Ccl20</i>                   | GTGGGTTTCACAAGACAGATG   | TTTCACCCAGTTCTGCTTTG        |
| <i>Cxcl1</i>                   | GCTGGGATTCACCTCAATG     | TGGGGACACCTTTTAGCATC        |
| <i>Tnf<math>\alpha</math></i>  | AATGGCCTCCCTCTCATCAGTT  | CGAATTTTGAGAAGATGATCTGAGTGT |
| <i>Tgf<math>\beta</math></i>   | TGACGTCACTGGAGTTGTACGG  | GGTTCATGTCATGGATGGTGC       |
| <i>Gapdh</i>                   | TGTGTCCGTCGTGGATCTGA    | TTGCTGTTGAAGTCGCAG          |

**Supplementary Table 1. Primer sequences for qPCR**

|                                                | DMSO      | DMSO + anti-TGF $\beta$ | DMXAA     | DMXAA + anti-TGF $\beta$ | DMXAA + anti-TGF $\beta$ + anti-IFN $\alpha$ R | DMXAA + anti-TGF $\beta$ + anti-CD8 |
|------------------------------------------------|-----------|-------------------------|-----------|--------------------------|------------------------------------------------|-------------------------------------|
| DMSO                                           | 1         |                         |           |                          |                                                |                                     |
| DMSO + anti-TGF $\beta$                        | 0.8668013 | 1                       |           |                          |                                                |                                     |
| DMXAA                                          | 0.0790010 | 0.1608655               | 1         |                          |                                                |                                     |
| DMXAA + anti-TGF $\beta$                       | 0.000003  | 0.0003630               | 0.00009   | 1                        |                                                |                                     |
| DMXAA + anti-TGF $\beta$ + anti-IFN $\alpha$ R | 0.4167757 | 0.3180283               | 0.0486888 | 0.0003630                | 1                                              |                                     |
| DMXAA + anti-TGF $\beta$ + anti-CD8            | 0.0001876 | 0.0023256               | 0.0018427 | 0.7794144                | 0.0023256                                      | 1                                   |

**Supplementary Table 2. p values related to *in vivo* treatments shown in Fig. 6d.** P values were obtained after running a Kolmogorov-Smirnov test on the distribution of tumor growths across mice.
